# Supplementary material for: A multicentre neonatal interventional randomised controlled trial of nebulized surfactant for preterm infants with respiratory distress: Neo-INSPIRe trial protocol
Source: Springer Nature journal article supplement (doi:10.1186/s12887-023-04296-4), 2023-09-19
Supplement: MOESM2 [file 26060108]

## APPENDIX A - DEFINITIONS

*Note: Definitions adapted from Vermont Oxford Network and The International Neonatal Consortium, Neonatal Adverse Event Severity Scale (INC NAESS)*

*(Available at: <https://vtoxford.zendesk.com/hc/en-us/articles/4405064008467-2022-Manual-of-Operations-Part-2-Release-26-2-PDF-> and <https://pubmed.ncbi.nlm.nih.gov/31537552/>)*

The following are documented as adverse events in the **first 72 hours of age ONLY**:

### **BRADYCARDIA**

- Heart rate < 80 beats per minute sustained for at least 30 minutes.

### **TACHYCARDIA**

- Heart rate > 200 beats per minute sustained for at least 30 minutes.
- Tachycardia NOT related to atropine use, hyperthermia or another confirmed adverse event such as infection.

The following are documented as adverse events at **ANY time during admission** (i.e., from randomisation until discharge/death)

### **BACTERIAL SEPSIS AND/OR MENINGITIS**

- One or more of the following bacterial pathogens was recovered from a blood and/or cerebrospinal fluid culture obtained.
- Up to three bacterial pathogens may be recorded.
- See list of pathogens in Appendix B

## BRONCHOPULMONARY DYSPLASIA (BPD)

A preterm infant < 33 weeks gestation will be deemed to have BPD if they require respiratory support at 36 weeks PMA (adapted from VON criteria and Bronchopulmonary Dysplasia: Executive Summary of a Workshop (Higgins et al (16))). BPD will be graded as follows:

| Grades | Invasive MV | nCPAP or HFNC<br>> 2L/min | NC ≤ 2L/min |
|--------|-------------|---------------------------|-------------|
| I      |             | 21 %                      | 22 – 29 %   |
| II     | 21 %        | 22 – 29 %                 | ≥ 30 %      |
| III    | > 21 %      | ≥ 30 %                    |             |

*Abbreviations: MV = mechanical ventilation; nCPAP = nasal continuous positive airway pressure; HFNC = high flow nasal cannula; NC = nasal cannula; min = minutes*

## COAGULATION DISORDER

- Abnormal blood clotting or bleeding that requires intervention with blood products.

## PERIVENTRICULAR – INTRAVENTRICULAR HAEMORRHAGE (PIH), WORST GRADE

- If a cranial ultrasound was performed on or before Day 28, the worst grade of PIH will be documented using the criteria below.
  - Grade 1: Subependymal germinal matrix haemorrhage only
  - Grade 2: Intraventricular blood, no ventricular dilation
  - Grade 3: Intraventricular blood, ventricular dilation
  - Grade 4: Intraparenchymal haemorrhage

## **FOCAL INTESTINAL PERFORATION**

- Surgically confirmed based on visual inspection of the bowel at the time of surgery or post-mortem examination that demonstrates a single focal perforation with the remainder of the bowel appearing normal, or clinically confirmed if they do not satisfy the definition for NEC.

## **FUNGAL INFECTION**

- Document if a fungus was recovered from a blood culture obtained from either a central line or peripheral blood sample.

## **RETINOPATHY OF PREMATURITY (ROP)**

If a retinal examination was performed, document the worst stage on any exam in the eye with the most advanced stage.

- Stage 1: Presence of demarcation line (+/- abnormal vascularization)
- Stage 2: Presence of intraretinal ridge
- Stage 3: Presence of a ridge with extraretinal fibrovascular proliferation
- Stage 4: Partial retinal detachment
- Stage 5: Total retinal detachment

## **NECROTIZING ENTEROCOLITIS (NEC)**

Must be diagnosed at surgery, at post-mortem examination, or with clinical and diagnostic imaging using the following criteria.

- At least one of the following clinical signs present:
  - Bilious gastric aspirate or emesis
  - Abdominal distension or discoloration
  - Occult or gross blood in stool (no fissure),

AND

- At least one of the following diagnostic imaging findings present:
  - Pneumatosis intestinalis
  - Hepato-biliary gas
  - Pneumoperitoneum

### **PATENT DUCTUS ARTERIOSUS (PDA)**

- At least one of the following findings is present
  - Left to Right or bidirectional ductal shunt on Doppler echo
  - Systolic or continuous murmur

AND

- At least two of the following findings are present:
  - Hyperdynamic precordium
  - Bounding pulses
  - Wide pulse pressure
  - Pulmonary vascular congestion, cardiomegaly, or both

### **PERIVENTRICULAR – INTRAVENTRICULAR HAEMORRHAGE (PIH), WORST GRADE**

- If a cranial ultrasound was performed on or before Day 28, the worst grade of PIH will be documented using the criteria below.
  - Grade 1: Subependymal germinal matrix haemorrhage only
  - Grade 2: Intraventricular blood, no ventricular dilation
  - Grade 3: Intraventricular blood, ventricular dilation
  - Grade 4: Intraparenchymal haemorrhage

## **PNEUMOTHORAX**

- The presence of extra-pleural air diagnosed by chest radiograph or needle aspiration (thoracentesis)

## **PULMONARY HAEMORRHAGE**

- Frank blood with respiratory compromise requiring escalation of respiratory support.

## **SEIZURES**

- Record seizures as adverse events only if:
  - o Status epilepticus: > 30 minutes duration within any hour, OR
  - o Recurrent seizures: each > 30 seconds per hour requiring > 1 anti-seizure drug within a 3-day period.
- Seizures should preferably be EEG confirmed.
- Can be electro-clinical or electrographic only.

## **SEVERE APNOEA**

- Two or more apnoeas per hour requiring bag-mask ventilation.

## **SEVERE HYPOTENSION**

- Requiring inotropes to maintain blood pressure.

# APPENDIX B

## BACTERIAL PATHOGENS

- *Achromobacter* species [including *A. xylosoxidans* (also known as *Alcaligenes xylosoxidans*) and others]
- *Acinetobacter* species including multidrug-resistant *Acinetobacter*
- *Aeromonas* species
- *Alcaligenes* species [*A. xylosoxidans* and others]
- *Bacteroides* species
- *Burkholderia* species [*B. capeciae* and others]
- *Campylobacter* species [*C. fetus*, *C. jejuni* and others] including drug-resistant *Campylobacter*
- *Chryseobacterium* species
- *Citrobacter* species [*C. diversus*, *C. freundii*, *C. koseri* and others]
- *Clostridium* species
- *Enterobacter* species [*E. aerogenes*, *E. cloacae*, and others] including Carbapenem-resistant *Enterobacter*
- *Enterococcus* species [*E. faecalis* (also known as *Streptococcus faecalis*), *E. faecium*, and others] including Vancomycin-resistant *Enterococcus*
- *Escherichia coli* including Carbapenem-resistant *Escherichia coli*
- *Flavobacterium* species
- *Haemophilus* species [*H. influenzae* and others]
- *Klebsiella* species [*K. oxytoca*, *K. pneumoniae* and others] including Carbapenem-resistant *Klebsiella* and Cephalosporin-resistant *Klebsiella*
- *Listeria monocytogenes*
- *Moraxella* species [*M. catarrhalis* (also known as *Branhamella catarrhalis*) and others]
- *Morganella morganii*
- *Neisseria* species [*N. meningitidis*, *N. gonorrhoeae* and others] including drug-resistant *N. gonorrhoeae*
- *Pantoea*
- *Pasteurella* species
- *Prevotella* species

- Proteus species [P. mirabilis, P. vulgaris and others]
- Providencia species [P. rettgeri and others]
- Pseudomonas species [P. aeruginosa and others] including multidrug-resistant Pseudomonas aeruginosa
- Ralstonia species
- Salmonella species including drug-resistant Salmonella serotype Typhi
- Serratia species [S. liquefaciens, S. marcescens and others]
- Staphylococcus coagulase positive [aureus] including Methicillin-resistant Staphylococcus aureus and Vancomycin-resistant Staphylococcus aureus
- Stenotrophomonas maltophilia
- Group B Streptococcus or GBS [also known as Streptococcus agalactiae]
- Streptococcus anginosus [formerly Streptococcus milleri]
- Streptococcus pneumoniae
- Streptococcus pyogenes [Group A Streptococcus]
