# Supplementary material for: A multicentre neonatal interventional randomised controlled trial of nebulized surfactant for preterm infants with respiratory distress: Neo-INSPIRe trial protocol
Source: Springer Nature journal article supplement (doi:10.1186/s12887-023-04296-4), 2023-09-19
Supplement: MOESM4 [file 26060108]

## APC-AF-CLN-004 Source Documents

### Table of Contents

#### **Screening 2 – 24 hr. of Age:**

Form 1 – Screening and Eligibility - Informed Consent and Inclusion/Exclusion Criteria

Form 2 – Randomization and Infant Demographics

Form 3 - Infant Delivery Information

Form 4 - Maternal/Perinatal Data

#### **Birth-Growth Log:**

Form 5 – Birth Infant Measurements and Growth

#### **Dosing (1, 2):**

Form 6 - AeroFact Dosing

#### **Serial Respiratory Status Through Discharge/Death:**

Form 7a - Serial Respiratory Status  $\leq$  4 h after randomization

Form 7b - Serial Respiratory Status > 4 h to 24 h after randomization

Form 7c - Serial Respiratory Status > 24 h to 72 h after randomization

Form 7d - Serial Respiratory Status 72 after randomization to Discharge/Death

#### **Treatment Failure:**

Form 8 - Treatment Failure

#### **Intubations and Extubations Log**

Form 9 - Intubations and Extubations Log

#### **Bolus Surfactant Instillation Log (1, 2, 3)**

Form 10 - Bolus Surfactant Instillation Log

#### **36 Weeks PMA:**

Form 11 - 36 Week Respiratory and BPD Status

#### **Adverse Events:**

Form 12 - Adverse Events

#### **Surgeries:**

Form 13 - Surgeries

#### **Transfusions :**

Form 14 - Transfusions

#### **Concomitant Medications :**

Form 15 - Concomitant Medications

#### **Discharge:**

Form 16 - Discharge from NICU

#### **Protocol Deviations :**

Form 17 - Protocol Deviations

#### **Device Performance :**

Form 18 - Device Performance

**Form 1** (page 1)**Patient Eligibility 2 – 24 hrs. of Age****1.0. Inclusion/Exclusion**

| Infants must have a <b>YES</b> box checked for each of the following criteria for study inclusion:                |                                                                                                                                                                                                                                               |     |    |
|-------------------------------------------------------------------------------------------------------------------|-----------------------------------------------------------------------------------------------------------------------------------------------------------------------------------------------------------------------------------------------|-----|----|
| #                                                                                                                 | <u>Inclusion</u> Criteria                                                                                                                                                                                                                     | YES | NO |
| 1                                                                                                                 | Inborn                                                                                                                                                                                                                                        |     |    |
| 2                                                                                                                 | Birth Weight 900 – 199 g                                                                                                                                                                                                                      |     |    |
| 3                                                                                                                 | 27-34 weeks gestational age                                                                                                                                                                                                                   |     |    |
| 4                                                                                                                 | 2 – 24 hours of age at the time of randomization                                                                                                                                                                                              |     |    |
| 5                                                                                                                 | Persistent fractional inspired oxygen (FiO <sub>2</sub> ) of 0.25 – 0.35 on nCPAP at 5-7 cmH <sub>2</sub> O to maintain peripheral oxygen saturation of 90% -95%. FiO <sub>2</sub> requirement needs to be sustained for at least 15 minutes. |     |    |
| If <b>NO</b> is answered to any of the above, the infant is a screen failure and will not continue in the study.  |                                                                                                                                                                                                                                               |     |    |
| Infants must have a <b>NO</b> box checked for each of the following criteria for study inclusion:                 |                                                                                                                                                                                                                                               |     |    |
| #                                                                                                                 | <u>Exclusion</u> Criteria                                                                                                                                                                                                                     | YES | NO |
| 1                                                                                                                 | Administration of inotropes and/or intubation prior to enrollment (in the delivery room or the NICU)                                                                                                                                          |     |    |
| 2                                                                                                                 | 5-minute APGAR score $\leq$ 5                                                                                                                                                                                                                 |     |    |
| 3                                                                                                                 | Prior instillation of intratracheal surfactant                                                                                                                                                                                                |     |    |
| 4                                                                                                                 | Pneumothorax that requires needle thoracentesis or insertion of intracostal chest drain                                                                                                                                                       |     |    |
| 5                                                                                                                 | Life threatening congenital anomaly                                                                                                                                                                                                           |     |    |
| 6                                                                                                                 | Known or suspected chromosomal abnormality                                                                                                                                                                                                    |     |    |
| 7                                                                                                                 | Known or suspected congenital infection including syphilis, cytomegalovirus, or toxoplasmosis                                                                                                                                                 |     |    |
| If <b>YES</b> is answered to any of the above, the infant is a screen failure and will not continue in the study. |                                                                                                                                                                                                                                               |     |    |

- 1.1. Does the Subject meet all the Inclusion Criteria and none of the Exclusion Criteria specified in the protocol?  Yes  No

\_\_\_\_\_  
Principal Investigator/Sub-Investigator Signature

\_\_\_\_\_  
Date





Participant Number: \_\_\_\_\_

Site Number: \_\_\_\_\_

## Form 3

### Infant Delivery Information

3.1. Delivery Route:    \_\_\_ Vaginal  
                              \_\_\_ Caesarean

3.1.1. If Cesarean, was mother in labor?  
          \_\_\_ YES  
          \_\_\_ NO

3.1.2. If Cesarean, indication: (Select primary indication-select one)

- \_\_\_ MATERNAL (Hypertension related - Pre-eclampsia/Eclampsia/HELLP)
- \_\_\_ MATERNAL (Previous Cesarean Section if mom in preterm labor)
- \_\_\_ MATERNAL (Placental: Placenta Previa, Abruptio Placenta, Antepartum Haemorrhage)
- \_\_\_ FETAL: (Suspicious or pathological CTG/Fetal doppler/IUGR)
- \_\_\_ FETAL: (Presentation - Breech or abnormal lie/presentation)
- \_\_\_ OTHER: Specify Other \_\_\_\_\_

3.2. Delivery Resuscitation Required:  
          \_\_\_ YES  
          \_\_\_ NO

3.2.1. *If yes to above, specify type of resuscitation (check all that apply):*

**Selections:**

- \_\_\_ Oxygen
- \_\_\_ Mask CPAP
- \_\_\_ Positive Pressure ventilation
- \_\_\_ Chest Compressions

3.3. Apgar Scores:

1 Minute After Birth: \_\_\_\_\_

5 Minutes After Birth: \_\_\_\_\_

10 Minutes After Birth: \_\_\_\_\_

3.4. Temperature within first hour of admission to NICU:

- \_\_\_ < 36.0 C
- \_\_\_ 36.0 - 37.5 C
- \_\_\_ > 37.5 C

Completed by (signature): \_\_\_\_\_

Date Completed: \_\_\_\_\_



**Form 4** *(page 2)*  
**Maternal/Perinatal Data**

**Maternal Concomitant Medication/Therapies:**

## 4.10. Chronic Maternal Hypertension:

- YES, treated  
 YES, untreated  
 NO

## 4.10.1. Pre-Eclampsia

- YES  
 NO

## 4.11. Maternal Diabetes:

- YES  
 NO

## 4.11.1. If Yes, HbA1c in last known within past 3 months (%):

- .  (Numeric X.X from maternal medical record)  
 Unknown

## 4.11.2. Treatment for Maternal Diabetes:

- Diet/No Meds  
 Oral Meds  
 Insulin

## 4.12. Maternal HIV Infection:

- YES  
 NO

## 4.12.1. If YES, Indicate viral Risk category:

- High Risk (maternal VL > 1000 copies)  
 Low Risk (maternal VL ≤ 1000 copies)

## 4.12.2. If YES, Infant PMTCT:

- Nevirapine (NVP) only  
 Nevirapine (NVP) and Zidovudine (AZT)  
 Other: Specify \_\_\_\_\_

## 4.12.3. If YES, Infants Birth PCR:

- NEGATIVE  
 POSITIVE

*(If POSITIVE:)*

## 4.12.3.1. Antiretroviral Regimen Taken?

- YES  
 NO

## 4.12.3.2. If Yes, Specify Antiretroviral Regimen:

- NVP/AZT/3TC  
 Kaletra/AZT/3TC  
 Kaletra/ABC/3TC  
 Other, Specify \_\_\_\_\_

Completed by (signature): \_\_\_\_\_

Date Completed: \_\_\_\_\_

Participant Number: \_\_\_\_\_

Site Number: \_\_\_\_\_

**Form 4** (page3)

**Maternal/Perinatal Data**

4.13. Maternal Syphilis:

\_\_\_\_ YES

\_\_\_\_ NO

4.13.1. If YES, indicate Maternal treatment:

\_\_\_\_ COMPLETE (once weekly for 3 doses)

\_\_\_\_ INCOMPLETE (2 doses or less)

\_\_\_\_ NONE

4.13.2. If NONE or INCOMPLETE, Infant treatment:

\_\_\_\_ Stat dose Benzathine (Penicillin) IMI

\_\_\_\_ 10 days Benzyl Penicillin IVI

4.14. Maternal TB:

\_\_\_\_ YES

\_\_\_\_ NO

4.14.1. IF YES, Infant TB prophylaxis:

\_\_\_\_ YES

\_\_\_\_ NO

Completed by (signature): \_\_\_\_\_

Date Completed: \_\_\_\_\_



Participant Number: \_\_\_\_\_

Site Number: \_\_\_\_\_

## **Form 5** *(page 1)*

### **Growth - Infant Measurements**

5.1. Timepoint: **Birth**

5.2. Weight: \_\_\_\_\_ grams  Unknown

5.3. Head Circumference: \_\_\_\_\_ . \_\_\_\_ cm  Unknown

5.4. Recumbent Length: \_\_\_\_\_ cm  Unknown

5.5. Intra-uterine Growth Restriction (Select Yes or No)

\_\_\_\_\_ Yes

\_\_\_\_\_ No

5.5.1. IF Yes to Intra-uterine Growth Restriction (Choose: \_\_\_ Symmetrical, \_\_\_ Asymmetrical)

Completed by (signature): \_\_\_\_\_

Date Completed: \_\_\_\_\_

**Form 5** (page 2)**Growth - Infant Measurements****Subsequent Growth Parameters:** Collect Weight and Head Circumference weekly to Discharge/Death.

Click "Add" in Medrio for additional timepoints.

| Timepoint       | 5.1.<br>Date<br>(dd/ mmm/yyyy)    | 5.2.<br>Weight<br>(grams)         | 5.3.<br>Head Circumference<br>(___. __cm) |
|-----------------|-----------------------------------|-----------------------------------|-------------------------------------------|
| Birth + 1 week  | <input type="checkbox"/> Not Done | <input type="checkbox"/> Not Done | <input type="checkbox"/> Not Done         |
| Birth + 2 week  | <input type="checkbox"/> Not Done | <input type="checkbox"/> Not Done | <input type="checkbox"/> Not Done         |
| Birth + 3 week  | <input type="checkbox"/> Not Done | <input type="checkbox"/> Not Done | <input type="checkbox"/> Not Done         |
| Birth + 4 week  | <input type="checkbox"/> Not Done | <input type="checkbox"/> Not Done | <input type="checkbox"/> Not Done         |
| Birth + 5 week  | <input type="checkbox"/> Not Done | <input type="checkbox"/> Not Done | <input type="checkbox"/> Not Done         |
| Birth + 6 week  | <input type="checkbox"/> Not Done | <input type="checkbox"/> Not Done | <input type="checkbox"/> Not Done         |
| Birth + 7 week  | <input type="checkbox"/> Not Done | <input type="checkbox"/> Not Done | <input type="checkbox"/> Not Done         |
| Birth + 8 week  | <input type="checkbox"/> Not Done | <input type="checkbox"/> Not Done | <input type="checkbox"/> Not Done         |
| Birth + 9 week  | <input type="checkbox"/> Not Done | <input type="checkbox"/> Not Done | <input type="checkbox"/> Not Done         |
| Birth + 10 week | <input type="checkbox"/> Not Done | <input type="checkbox"/> Not Done | <input type="checkbox"/> Not Done         |
| Birth + 11 week | <input type="checkbox"/> Not Done | <input type="checkbox"/> Not Done | <input type="checkbox"/> Not Done         |
| Birth + 12 week | <input type="checkbox"/> Not Done | <input type="checkbox"/> Not Done | <input type="checkbox"/> Not Done         |
| Birth + 13 week | <input type="checkbox"/> Not Done | <input type="checkbox"/> Not Done | <input type="checkbox"/> Not Done         |
| Birth + 14 week | <input type="checkbox"/> Not Done | <input type="checkbox"/> Not Done | <input type="checkbox"/> Not Done         |
| Birth + 15 week | <input type="checkbox"/> Not Done | <input type="checkbox"/> Not Done | <input type="checkbox"/> Not Done         |
| Birth + 16 week | <input type="checkbox"/> Not Done | <input type="checkbox"/> Not Done | <input type="checkbox"/> Not Done         |
| Birth + 17 week | <input type="checkbox"/> Not Done | <input type="checkbox"/> Not Done | <input type="checkbox"/> Not Done         |
| Discharge       | <input type="checkbox"/> Not Done | <input type="checkbox"/> Not Done | <input type="checkbox"/> Not Done         |

Participant Number: \_\_\_\_\_

Site Number: \_\_\_\_\_

**Form 6 - AeroFact Dosing – Dose 1****NEO-INSPIRe – AeroFact CALCULATION AND DISPENSING FORM**

Investigational Product: SF-RI 1 (AlveoFact)

Protocol Number: APC-AF-CLN-004

Infant Subject ID: 1 - \_\_\_\_\_ - \_\_\_\_\_ - \_\_\_\_\_

Dose Number:  1  2

Dosing Calculation:

Formula: Birth Weight (BW) x (216mg/kg) = Total Dose (mg)    Total Dose (mg) ÷ 45mg/mL = Total volume to be administered    Total Volume (mL) ÷ 2.4 mL/vial = # of trays to be dispense

| Birth Weight (grams) | Birth Weight (kg) | Assigned Dose                               | 6.3. Total Dose (mg) to administer (Enter into Medrio) | 6.4. Total Volume (mL) to administer (Enter into Medrio) | # of Trays SF-RI 1 Dispensed |
|----------------------|-------------------|---------------------------------------------|--------------------------------------------------------|----------------------------------------------------------|------------------------------|
|                      |                   | 216 mg/kg                                   | _____                                                  | _____                                                    |                              |
| Dispensed by:        |                   | Signature of Pharmacist, Doctor or Designee |                                                        |                                                          | Date                         |

**Dose Delivery: Dose Delivery**

- 6.1. Dose (check one)                      Dose 1                      Dose 2
- 6.2. Was Dose started?                      Yes                      No
- 6.2.1. If No, Indicate Reason (circle) \_\_\_\_\_ Selections:** Adverse Event, Met Failure Criteria, Staffing issue, Device Performance issue, Protocol Deviation, Other: Specify Other \_\_\_\_\_. If AE, AE number: \_\_\_\_\_
- 6.5. Start Date of Dose\*: \_\_\_\_/\_\_\_\_/\_\_\_\_ \*Note: This cannot be a partial date.
- 6.6. Dose Start Time (T<sub>0</sub>) (24-hr clock): \_\_\_\_\_
- 6.7. Respiratory Status at **Start** of AeroFact Dose: nCPAP \_\_\_\_\_ cmH<sub>2</sub>O, FiO<sub>2</sub> \_\_\_\_\_, SpO<sub>2</sub> \_\_\_\_\_,
- 6.8. End Date of Dose\*: \_\_\_\_/\_\_\_\_/\_\_\_\_
- 6.9. Dose Stop Time (T<sub>END</sub>) (24-hr clock): \_\_\_\_\_
- 6.10. Total Dose of AeroFact delivered: \_\_\_\_\_ mg (XXX.X)
- 6.11. Total Volume of AeroFact administered: \_\_\_\_\_ mL (X.X)
- 6.11.1. If AF dose delivered was less than AF Dose ordered, give reason (circle one):**  
 1 – Adverse Event 2 - Pt met FAILURE criteria; 3 – Staffing Issue; 4 - Device Performance Issue (complete Device Performance Form); 5 – Protocol Deviation; 6 – Other, specify: \_\_\_\_\_, If A/E, # \_\_\_\_\_.
- 6.12. Respiratory Status at **END** of AeroFact Dose: nCPAP \_\_\_\_\_ cmH<sub>2</sub>O, FiO<sub>2</sub> \_\_\_\_\_, SpO<sub>2</sub> \_\_\_\_\_
- 6.13 **Controller Serial Number:** \_\_\_\_\_
- 6.14 **Pod Serial Number:** \_\_\_\_\_
- 6.15 **Drug Delivery Circuit Serial Number:** \_\_\_\_\_
- 6.16. Was AeroFact dose paused at any point (other than vial changes, check yes/no):    \_\_\_\_ Yes                      \_\_\_\_ No
- 6.16.1. If paused, indicate reason: \_\_\_\_\_
- 6.17. 30 minutes following completion of AeroFact dose, did the infant qualify for a repeat dose of AeroFact?  
 Choose    \_\_\_\_ Yes.    \_\_\_\_ No (6.17. Only Displays after Dose 1).

Dose administered by (printed name) \_\_\_\_\_ Initials \_\_\_\_\_ Date \_\_\_\_\_

Participant Number: \_\_\_\_\_

Site Number: \_\_\_\_\_

**Form 6 - AeroFact Dosing – Dose 2****NEO-INSPiRe – AeroFact CALCULATION AND DISPENSING FORM**

Investigational Product: SF-RI 1 (Alveofact)

Protocol Number: APC-AF-CLN-004

Infant Subject ID: 1 - \_\_\_\_\_ - \_\_\_\_\_ - \_\_\_\_\_

Dose Number:  1      **X 2**

Dosing Calculation:

Formula: Birth Weight (BW) x (216mg/kg) = Total Dose (mg)      Total Dose (mg) ÷ 45mg/mL = Total volume to be administered      Total Volume (mL) ÷ 2.4 mL/vial = # of trays to be dispense

| Birth Weight (grams) | Birth Weight (kg) | Assigned Dose                               | 6.3. Total Dose (mg) to administer (Enter into Medrio) | 6.4. Total Volume (mL) to administer (Enter into Medrio) | # Trays SF-RI 1 Dispensed |
|----------------------|-------------------|---------------------------------------------|--------------------------------------------------------|----------------------------------------------------------|---------------------------|
|                      |                   | 216 mg/kg                                   | _____                                                  | _____                                                    |                           |
| Dispensed by:        |                   | Signature of Pharmacist, Doctor or Designee |                                                        |                                                          | Date                      |

**Dose Delivery: Dose Delivery**

6.1. Dose (check one)      Dose 1      Dose 2

6.2. Was Dose started?      Yes      No

**6.2.1. If No, Indicate Reason (circle)** \_\_\_\_\_ **Selections:** Adverse Event, Met Failure Criteria, Staffing issue, Device Performance issue, Protocol Deviation, Other: Specify Other \_\_\_\_\_. If AE, AE number: \_\_\_\_\_

6.5. Start Date of Dose\*: \_\_\_\_/\_\_\_\_/\_\_\_\_ \*Note: This cannot be a partial date.

6.6. Dose Start Time (T<sub>0</sub>) (24-hr clock): \_\_\_\_\_6.7. Respiratory Status at **Start** of AeroFact Dose: nCPAP \_\_\_\_\_ cmH<sub>2</sub>O, FiO<sub>2</sub> \_\_\_\_\_, SpO<sub>2</sub> \_\_\_\_\_,

6.8. End Date of Dose\*: \_\_\_\_/\_\_\_\_/\_\_\_\_

6.9. Dose Stop Time (T<sub>END</sub>) (24-hr clock): \_\_\_\_\_

6.10. Total Dose of AeroFact delivered: \_\_\_\_\_ mg (XXX.X)

6.11. Total Volume of AeroFact administered: \_\_\_\_\_ mL (X.X)

**6.11.1. If AF dose delivered was less than AF Dose ordered, give reason (circle one):**

1 – Adverse Event 2 - Pt met FAILURE criteria; 3 – Staffing Issue; 4 - Device Performance Issue (complete Device Performance Form); 5 – Protocol Deviation; 6 – Other, specify: \_\_\_\_\_, If A/E, # \_\_\_\_\_.

6.12. Respiratory Status at **END** of AeroFact Dose: nCPAP \_\_\_\_\_ cmH<sub>2</sub>O, FiO<sub>2</sub> \_\_\_\_\_, SpO<sub>2</sub> \_\_\_\_\_6.13 **Controller Serial Number:** \_\_\_\_\_6.14 **Pod Serial Number:** \_\_\_\_\_6.15 **Drug Delivery Circuit Serial Number:** \_\_\_\_\_

6.16. Was AeroFact dose paused at any point (other than vial changes, check yes/no):      Yes      No

6.16.1. If paused, indicate reason: \_\_\_\_\_

6.17. 30 minutes following completion of AeroFact dose, did the infant qualify for a repeat dose of AeroFact?

Choose      Yes.      No (6.17. Only Displays after Dose 1).

Dose administered by (printed name) \_\_\_\_\_ Initials \_\_\_\_\_ Date \_\_\_\_\_

Participant Number: \_\_\_\_\_

Site Number: \_\_\_\_\_

**FORM 7a** (page 1)**Serial Subject Data ≤ 4 h After Randomization****Q 30 minutes Randomization to 4 hours***Note: Choose representative values for the time period evaluated- infant at rest. If you change to higher level of support, record the higher level of support for that time period.*

| Patient Status<br>Randomization to ≤ 4 hours |             |                       |                          |                     |                      |                              |                 |                  | Respiratory Status<br>Randomization to ≤ 4 hours |                    |                     |                     |                    |                |                                       |             |
|----------------------------------------------|-------------|-----------------------|--------------------------|---------------------|----------------------|------------------------------|-----------------|------------------|--------------------------------------------------|--------------------|---------------------|---------------------|--------------------|----------------|---------------------------------------|-------------|
| Time Point                                   | Not Done    | Date<br>(dd-mmm-yyyy) | Time<br>(24-hr<br>Clock) | HR<br>beats/<br>min | RR<br>breath<br>/min | Severe<br>Apnea*<br>(Yes/No) | Oral<br>Suction | Nasal<br>Suction | Type of<br>Support<br>**                         | PIP<br>(cm<br>H2O) | PEEP<br>(cm<br>H2O) | CPAP<br>(cm<br>H2O) | MAP<br>(cm<br>H2O) | FiO2<br>(x.xx) | Flow<br>Liters<br>per<br>min<br>(lpm) | SpO2<br>(%) |
| Rand T0                                      | Not<br>Done |                       |                          |                     |                      |                              |                 |                  |                                                  |                    |                     |                     |                    |                |                                       |             |
| Random<br>ization +<br>30 min                | Not<br>Done |                       |                          |                     |                      |                              |                 |                  |                                                  |                    |                     |                     |                    |                |                                       |             |
| Random<br>ization +<br>1 hr.                 | Not<br>Done |                       |                          |                     |                      |                              |                 |                  |                                                  |                    |                     |                     |                    |                |                                       |             |
| Random<br>ization +<br>1.5 hr.               | Not<br>Done |                       |                          |                     |                      |                              |                 |                  |                                                  |                    |                     |                     |                    |                |                                       |             |
| Random<br>ization +<br>2 hr.                 | Not<br>Done |                       |                          |                     |                      |                              |                 |                  |                                                  |                    |                     |                     |                    |                |                                       |             |
| Random<br>ization +<br>2.5 hr.               | Not<br>Done |                       |                          |                     |                      |                              |                 |                  |                                                  |                    |                     |                     |                    |                |                                       |             |
| Random<br>ization +<br>3 hr.                 | Not<br>Done |                       |                          |                     |                      |                              |                 |                  |                                                  |                    |                     |                     |                    |                |                                       |             |
| Random<br>ization +<br>3.5 hr.               | Not<br>Done |                       |                          |                     |                      |                              |                 |                  |                                                  |                    |                     |                     |                    |                |                                       |             |
| Random<br>ization +<br>4 hr.                 | Not<br>Done |                       |                          |                     |                      |                              |                 |                  |                                                  |                    |                     |                     |                    |                |                                       |             |

Participant Number: \_\_\_\_\_

Site Number: \_\_\_\_\_

**FORM 7a** (*page 2 - REFERENCE*)

**Serial Subject Data ≤ 4 h After Randomization**

**Q 30 minutes Randomization to 4 hours**

*Note: Choose representative values for the time period evaluated- infant at rest. If you change to higher level of support, record the higher level of support for that time period.*

**\*Severe Apnea:**

Severe apnoeas defined as two or more apnoeas per hour requiring bag-mask ventilation, or at clinician's discretion.

Only if Occurring in the previous 30 minutes.

**\*\*Type of Support Selections:**

HFOV  
CMV  
Biphasic CPAP  
CPAP  
HFNC  
NC ( $\leq 2\text{lpm}$ )  
Off All Support

**Type of Support Selections:**

*\* If Type of Support Selection = HFOV,  
Enter MAP and FiO2, SpO2*  
*\* If Type of Support Selection = CMV,  
Enter PIP, PEEP, MAP, FiO2, SpO2*  
*\* If Type of Support Selection = Biphasic CPAP,  
Enter PIP, PEEP, MAP, FiO2, SPO2*  
*\* If Type of Support Selection = CPAP,  
Enter CPAP, FiO2, SpO2*  
*\*If Type of Support Selection = HFNC,  
Enter LPM, FiO2, SpO2*  
*\*If Type of Support Selection = NC,  
Enter only LPM, FiO2, SpO2*

**FORM 7b** (page 1)**Serial Respiratory Status > 4 h to 24 h After Randomization (Hourly)**

**Note: Choose representative values for the time period evaluated- infant at rest. If you change to higher level of support during 1 hour time period, record the higher level of support**

| Time Point             | Not Done (circle) | Date (dd-mmm-yyyy) | Time (24-hr Clock) | Type of Support* | PIP (cm H2O) | PEEP (cm H2O) | CPAP (cm H2O) | MAP (cm H2O) | FiO2 (x.xx) | Liters Per min | SpO2 (%) |
|------------------------|-------------------|--------------------|--------------------|------------------|--------------|---------------|---------------|--------------|-------------|----------------|----------|
| Randomization + 5 hr.  | Not Done          |                    |                    |                  |              |               |               |              |             |                |          |
| Randomization + 6 hr.  | Not Done          |                    |                    |                  |              |               |               |              |             |                |          |
| Randomization + 7 hr.  | Not Done          |                    |                    |                  |              |               |               |              |             |                |          |
| Randomization + 8 hr.  | Not Done          |                    |                    |                  |              |               |               |              |             |                |          |
| Randomization + 9 hr.  | Not Done          |                    |                    |                  |              |               |               |              |             |                |          |
| Randomization + 10 hr. | Not Done          |                    |                    |                  |              |               |               |              |             |                |          |
| Randomization + 11 hr. | Not Done          |                    |                    |                  |              |               |               |              |             |                |          |
| Randomization + 12 hr. | Not Done          |                    |                    |                  |              |               |               |              |             |                |          |

**FORM 7b** (page 2)**Serial Respiratory Status > 4 h to 24 h After Randomization (Hourly)**

**Note: Choose representative values for the time period evaluated- infant at rest. If you change to higher level of support during 1 hour time period, record the higher level of support**

| <b>Time Point</b>      | <b>Not Done (circle)</b> | <b>Date (dd-mmm-yyyy)</b> | <b>Time (24-hr Clock)</b> | <b>Type of Support **</b> | <b>PIP (cm H2O)</b> | <b>PEEP (cm H2O)</b> | <b>CPAP (cm H2O)</b> | <b>MAP (cm H2O)</b> | <b>FiO2 (x.xx)</b> | <b>Liters Per min</b> | <b>SpO2 (%)</b> |
|------------------------|--------------------------|---------------------------|---------------------------|---------------------------|---------------------|----------------------|----------------------|---------------------|--------------------|-----------------------|-----------------|
| Randomization + 13 hr. | Not Done                 |                           |                           |                           |                     |                      |                      |                     |                    |                       |                 |
| Randomization + 14 hr. | Not Done                 |                           |                           |                           |                     |                      |                      |                     |                    |                       |                 |
| Randomization + 15 hr. | Not Done                 |                           |                           |                           |                     |                      |                      |                     |                    |                       |                 |
| Randomization + 16 hr. | Not Done                 |                           |                           |                           |                     |                      |                      |                     |                    |                       |                 |
| Randomization + 17 hr. | Not Done                 |                           |                           |                           |                     |                      |                      |                     |                    |                       |                 |
| Randomization + 18 hr. | Not Done                 |                           |                           |                           |                     |                      |                      |                     |                    |                       |                 |
| Randomization + 19 hr. | Not Done                 |                           |                           |                           |                     |                      |                      |                     |                    |                       |                 |
| Randomization + 20 hr. | Not Done                 |                           |                           |                           |                     |                      |                      |                     |                    |                       |                 |
| Randomization + 21 hr. | Not Done                 |                           |                           |                           |                     |                      |                      |                     |                    |                       |                 |
| Randomization + 22 hr. | Not Done                 |                           |                           |                           |                     |                      |                      |                     |                    |                       |                 |
| Randomization + 23 hr. | Not Done                 |                           |                           |                           |                     |                      |                      |                     |                    |                       |                 |
| Randomization + 24 hr. | Not Done                 |                           |                           |                           |                     |                      |                      |                     |                    |                       |                 |



**FORM 7c** (page 1)**Serial Respiratory Status > 24 h to 72 h After Randomization (Q 3 hours)**

Daily entry. Note: Choose representative values for the time period evaluated- infant at rest. If you change to higher level of support during 3-hour time period, record the higher level of support.

| Time Point             | Not Done | Date*<br>(dd-mmm-yyyy) | Time<br>(24-hr<br>Clock) | Type of<br>Support*<br>* | PIP<br>(cm H2O) | PEEP<br>(cm H2O) | CPAP<br>(cm H2O) | MAP<br>(cm H2O) | FiO2<br>(x.xx) | NC LPM<br>(x.xx?) | SpO2 (%) |
|------------------------|----------|------------------------|--------------------------|--------------------------|-----------------|------------------|------------------|-----------------|----------------|-------------------|----------|
| Randomization + 27 hr. | Not Done |                        |                          |                          |                 |                  |                  |                 |                |                   |          |
| Randomization + 30 hr. | Not Done |                        |                          |                          |                 |                  |                  |                 |                |                   |          |
| Randomization + 33 hr. | Not Done |                        |                          |                          |                 |                  |                  |                 |                |                   |          |
| Randomization + 36 hr. | Not Done |                        |                          |                          |                 |                  |                  |                 |                |                   |          |
| Randomization + 39 hr. | Not Done |                        |                          |                          |                 |                  |                  |                 |                |                   |          |
| Randomization + 42 hr. | Not Done |                        |                          |                          |                 |                  |                  |                 |                |                   |          |
| Randomization + 45 hr. | Not Done |                        |                          |                          |                 |                  |                  |                 |                |                   |          |
| Randomization + 48 hr. | Not Done |                        |                          |                          |                 |                  |                  |                 |                |                   |          |

**\*\*Type of Support Selections:**

HFOV

CMV

Biphasic CPAP

CPAP

HFNC

NC ( $\leq 2$  lpm)

Off All Support

**Type of Support Selections\*:**

\* If Type of Support Selection = HFOV, Enter MAP and FiO2, SpO2

\* If Type of Support Selection = CMV, Enter PIP, PEEP, MAP, FiO2, SpO2

\* If Type of Support Selection = Biphasic CPAP, Enter PIP, PEEP, MAP, FiO2, SpO2

\* If Type of Support Selection = CPAP, Enter CPAP, FiO2, SpO2

\* If Type of Support Selection = HFNC, Enter LPM, FiO2, SpO2

\* If Type of Support Selection = NC, Enter LPM, FiO2, SpO2

\*If Type of Support Selection = Off All Support, no other entry required

**FORM 7c** (page 2)**Serial Respiratory Status > 24 h to 72 h After Randomization (Q 3 hours)**

Daily entry. Note: Choose representative values for the time period evaluated- infant at rest. If you change to higher level of support during 3-hour time period, record the higher level of support.

| Time Point             | Not Done | Date*<br>(dd-mmm-yyyy) | Time<br>(24-hr<br>Clock) | Type of<br>Support<br>** | PIP<br>(cm H2O) | PEEP<br>(cm H2O) | CPAP<br>(cm H2O) | MAP<br>(cm H2O) | FiO2<br>(x.xx) | NC LPM<br>(x.xx?) | SpO2 (%) |
|------------------------|----------|------------------------|--------------------------|--------------------------|-----------------|------------------|------------------|-----------------|----------------|-------------------|----------|
| Randomization + 51 hr. | Not Done |                        |                          |                          |                 |                  |                  |                 |                |                   |          |
| Randomization + 54 hr. | Not Done |                        |                          |                          |                 |                  |                  |                 |                |                   |          |
| Randomization + 57 hr. | Not Done |                        |                          |                          |                 |                  |                  |                 |                |                   |          |
| Randomization + 60 hr. | Not Done |                        |                          |                          |                 |                  |                  |                 |                |                   |          |
| Randomization + 63 hr. | Not Done |                        |                          |                          |                 |                  |                  |                 |                |                   |          |
| Randomization + 66 hr. | Not Done |                        |                          |                          |                 |                  |                  |                 |                |                   |          |
| Randomization + 69 hr. | Not Done |                        |                          |                          |                 |                  |                  |                 |                |                   |          |
| Randomization + 72 hr. | Not Done |                        |                          |                          |                 |                  |                  |                 |                |                   |          |

**\*\*Type of Support Selections:**

HFOV

CMV

Biphasic CPAP

CPAP

HFNC

NC ( $\leq 2$  lpm)

Off All Support

**Type of Support Selections\*:**

\* If Type of Support Selection = HFOV, Enter MAP and FiO2, SpO2

\* If Type of Support Selection = CMV, Enter PIP, PEEP, MAP, FiO2, SpO2

\* If Type of Support Selection = Biphasic CPAP, Enter PIP, PEEP, MAP, FiO2, SPO2

\* If Type of Support Selection = CPAP, Enter CPAP, FiO2, SpO2

\* If Type of Support Selection = HFNC, Enter LPM, FiO2, SpO2

\* If Type of Support Selection = NC, Enter LPM, FiO2, SpO2

\*If Type of Support Selection = Off All Support, no other entry required

**FORM 7d** (page 1)**Daily Serial Respiratory Status > 72 h until Discharge/Death**

Daily entry. Note: Choose representative values for the time period evaluated- infant at rest. If you change to higher level of support, record the higher level of support.

| Time Point (Age in Days) | Not Done | Date* (dd-mmm-yyyy) | Time (24-hr Clock) | Type of Support*<br>* | PIP (cm H2O) | PEEP (cm H2O) | CPAP (cm H2O) | MAP (cm H2O) | FiO2 (x.xx) | NC LPM (x.xx?) | SpO2 (%) |
|--------------------------|----------|---------------------|--------------------|-----------------------|--------------|---------------|---------------|--------------|-------------|----------------|----------|
| 4                        |          |                     |                    |                       |              |               |               |              |             |                |          |
| 5                        |          |                     |                    |                       |              |               |               |              |             |                |          |
| 6                        |          |                     |                    |                       |              |               |               |              |             |                |          |
| 7                        |          |                     |                    |                       |              |               |               |              |             |                |          |
| 8                        |          |                     |                    |                       |              |               |               |              |             |                |          |
| 9                        |          |                     |                    |                       |              |               |               |              |             |                |          |
| 10                       |          |                     |                    |                       |              |               |               |              |             |                |          |
| 11                       |          |                     |                    |                       |              |               |               |              |             |                |          |
| 12                       |          |                     |                    |                       |              |               |               |              |             |                |          |
| 13                       |          |                     |                    |                       |              |               |               |              |             |                |          |
| 14                       |          |                     |                    |                       |              |               |               |              |             |                |          |

**\*\*Type of Support Selections\*:**

HFOV  
CMV  
Biphasic CPAP  
CPAP  
HFNC  
NC (< 2 lpm)  
Off All Support

**Type of Support Selections\*:**

\* If Type of Support Selection = HFOV, Enter MAP and FiO2, SpO2  
\* If Type of Support Selection = CMV, Enter PIP, PEEP, MAP, FiO2, SpO2  
\* If Type of Support Selection = Biphasic CPAP, Enter PIP, PEEP, MAP, FiO2, SpO2  
\* If Type of Support Selection = CPAP, Enter CPAP, FiO2, SpO2  
\* If Type of Support Selection = HFNC, Enter LPM, FiO2, SpO2  
\* If Type of Support Selection = NC, Enter LPM, FiO2, SpO2  
\* If Type of Support Selection = Off All Support, no other entry required



# FORM 8

## Treatment Failure

### *For Active or Control Subjects*

8.1. Did the infant meet Failure Criteria within first 72 hours of life?

Yes  
 No

8.1.1. If Yes, Indicate Date and Time Treatment Failure Met:

Date \_\_\_/\_\_\_/\_\_\_ time \_\_\_\_\_  
dd mmm yyyy HH:MM

8.1.2. If yes, record the respiratory parameters at the time of treatment failure:

NCPAP/PEEP \_\_\_\_\_ cm H<sub>2</sub>O  
F<sub>i</sub>O<sub>2</sub> \_\_\_\_\_  
S<sub>p</sub>O<sub>2</sub> \_\_\_\_\_ %

8.1.3. Select all reasons for Failure that apply: **(Checkboxes)**

- F<sub>i</sub>O<sub>2</sub> > 0.40 on nCPAP at 5-7 cm H<sub>2</sub>O to maintain S<sub>p</sub>O<sub>2</sub> 90-95% for (maintain for at least 15 min) (If Control patient on SiPaP, record PEEP pressure.
- Severe apnoeas defined as two or more apnoeas per hour requiring bag-mask ventilation, or at clinician's discretion.
- Severe increased work of breathing (at clinician's discretion) not responding to CPAP optimization, reposition of infant or suctioning of secretions.
- Other Specify Other: \_\_\_\_\_

8.2. Did the infant receive bolus surfactant within 2 hours after meeting failure criteria?

Yes If yes, complete Bolus Surfactant Instillation record.  
 No

8.2.1. If no, indicate Reason: (Choose one)

- Etiology not related to progression of RDS  
 Clinical decision to observe  
 Other; please specify \_\_\_\_\_

Treatment Failure determined by: \_\_\_\_\_

Signature

Date: (DD-MMM-YYYY)

Completed by (signature): \_\_\_\_\_

Date Completed: \_\_\_\_\_

# FORM 9

## 9.1. Intubations and Extubations Log (Form)

Was Infant intubated? Select, \_\_\_ Yes or \_\_\_ No.

If No, Skip all other fields on form. If yes, complete table below:

| Intubation Date/Time/Reason for Intubation |                        |                        |                             |                      |                                                   |                                                                   | Extubation Date/Time/Rationale |                        |                              |                         |                                                    |                                  |
|--------------------------------------------|------------------------|------------------------|-----------------------------|----------------------|---------------------------------------------------|-------------------------------------------------------------------|--------------------------------|------------------------|------------------------------|-------------------------|----------------------------------------------------|----------------------------------|
| 9.2.<br>Intubation #                       | 9.3.<br>Date Intubated | 9.4.<br>Time Intubated | 9.5. Reason for Intubation* | 9.5.1. Specify Other | 9.6.<br>FiO2 (prior to Intubation)<br>0.21 – 1.00 | 9.7.<br>Treatment Pressure CPAP/PEEP or MAP (prior to intubation) | 9.8.<br>Date Extubated         | 9.9.<br>Time Extubated | 9.10.<br>Extubation Reason** | 9.10.1<br>Specify Other | 9.11.<br>FiO2 (prior to extubation)<br>0.21 – 1.00 | 9.12.<br>MAP Prior to Extubation |
|                                            |                        |                        |                             |                      |                                                   |                                                                   |                                |                        |                              |                         |                                                    |                                  |
|                                            |                        |                        |                             |                      |                                                   |                                                                   |                                |                        |                              |                         |                                                    |                                  |
|                                            |                        |                        |                             |                      |                                                   |                                                                   |                                |                        |                              |                         |                                                    |                                  |
|                                            |                        |                        |                             |                      |                                                   |                                                                   |                                |                        |                              |                         |                                                    |                                  |

**\*9.5. Reason for Laryngoscopy/Intubation (choose one):**

- LISA
- INSURE
- ETT for Surf & Vent
- ETT for Resp Support
- ETT for Surgery only
- Other; Specify \_\_\_\_\_

*\* If Intubation Reason = LISA OR Extubation Reason = LISA, Skip – FiO2 and MAP prior to Extubation*

**\*\*9.10. Reason for Extubation (choose one):**

- LISA
- INSURE
- Planned Extubation
- Accidental Extubation
- Died/Discharged on Vent\*\*
- Other; Specify \_\_\_\_\_

*\*\*If Extubation Reason is recorded as Died/Discharged on Vent: Please enter the Extubation Date as Date of Death or Discharge and Extubation Time as Date of Death or Discharge*

# FORM 10

## Bolus Surfactant Instillation Log - Dose 1

10.1. Did Subject receive a bolus instillation of surfactant?

Yes  
 No

10.2. Dose Number:

Dose 1  
 Dose 2  
 Dose 3

10.3. How was the Bolus Instillation of Surfactant delivered?

LISA (Cannula/Catheter)  
 INSURE (ETT  $\leq$  2 hours)  
 Endotracheal Tube (> 2 hours)

10.4. Date and Time of Administration\*:  /  /   :   
DD MMM YYYY (24-Hour Clock)

10.5. Parameters immediately prior to instillation of bolus surfactant:

nCPAP / PEEP  cm H<sub>2</sub>O  
F<sub>I</sub>O<sub>2</sub>   
S<sub>p</sub>O<sub>2</sub>  %

10.6. Type of bolus instilled surfactant:

Curosurf  
 Survanta

10.7. Volume of Instilled Dose:  mL (xx.x)

Did subject receive another bolus instillation of surfactant?

Yes  
 No

Completed by (signature): \_\_\_\_\_

Date Completed: \_\_\_\_\_

# FORM 10

## Bolus Surfactant Instillation Log - Dose 2

10.1. Did Subject receive a 2<sup>nd</sup> bolus instillation of surfactant?

Yes  
 No

10.2. Dose Number:

Dose 1  
 Dose 2  
 Dose 3

10.3. How was the Bolus Instillation of Surfactant delivered?

LISA (Cannula/Catheter)  
 INSURE (ETT  $\leq$  2 hours)  
 Endotracheal Tube (> 2 hours)

10.4. Date and Time of Administration\*:  /  /   :   
DD MMM YYYY (24-Hour Clock)

10.5. Parameters immediately prior to instillation of bolus surfactant:

nCPAP /PEEP  cm H<sub>2</sub>O  
F<sub>I</sub>O<sub>2</sub>   
S<sub>p</sub>O<sub>2</sub>  %

10.6. Type of bolus instilled surfactant:

Curosurf  
 Survanta

10.7. Volume of Instilled Dose:  mL (xx.x)

Did subject receive another bolus instillation of surfactant?

Yes  
 No

Completed by (signature): \_\_\_\_\_

Date Completed: \_\_\_\_\_



# FORM 10

## Bolus Surfactant Instillation Log - Dose 3

10.1. Did Subject receive a 3<sup>rd</sup> bolus instillation of surfactant?

Yes  
 No

10.2. Dose Number:

Dose 1  
 Dose 2  
 Dose 3

10.3. How was the Bolus Instillation of Surfactant delivered?

LISA (Cannula/Catheter)  
 INSURE (ETT  $\leq$  2 hours)  
 Endotracheal Tube (> 2 hours)

10.4. Date and Time of Administration\*:  /  /   :   
DD MMM YYYY (24-Hour Clock)

10.5. Parameters immediately prior to instillation of bolus surfactant:

nCPAP /PEEP  cm H<sub>2</sub>O  
F<sub>i</sub>O<sub>2</sub>   
S<sub>p</sub>O<sub>2</sub>  %

10.6. Type of bolus instilled surfactant:

Curosurf  
 Survanta

10.7. Volume of Instilled Dose:  mL (xx.x)

Did subject receive another bolus instillation of surfactant?

Yes  
 No

Completed by (signature): \_\_\_\_\_

Date Completed: \_\_\_\_\_



# FORM 11 (page 2)

## 36 Week PMA - 36 Week Respiratory and BPD Status

- 11.3. If on support, Record FiO2 requirement at 36 weeks PMA:    \_\_\_ 0.21  
                                                                                                                                          \_\_\_ 0.22 – 0.29  
                                                                                                                                          \_\_\_  $\geq$  0.30

**BPD Status**

11.4. Does the infant have BPD? Select one:

- \_\_\_ Yes, Grade I  
 \_\_\_ Yes, Grade II  
 \_\_\_ Yes, Grade III  
 \_\_\_ No, off all support  
 \_\_\_ N/A, Died  
 \_\_\_ N/A, Born  $\geq$  33 weeks  
 \_\_\_ Unknown

**Grading for BPD:**

| Grades     | Invasive MV | nCPAP or HFNC<br>> 2L/min | NC $\leq$ 2L/min |
|------------|-------------|---------------------------|------------------|
| <b>I</b>   |             | 21 %                      | 22 – 29 %        |
| <b>II</b>  | 21 %        | 22 – 29 %                 | $\geq$ 30 %      |
| <b>III</b> | > 21 %      | $\geq$ 30 %               |                  |

Completed by (signature): \_\_\_\_\_ Date Completed: \_\_\_\_\_



# Form 12

## Adverse Event Table (Reference Guide)

Selected Co-Morbidities as AEs:

- Culture proven Sepsis
- ICH
- Cystic PVL
- Pneumothorax req CT
- Pulmonary Hemorrhage
- PDA requiring treatment
- Hypotension req inotropes
- NEC
- Isolated GI Perforation
- ROP
- Other

12. 5. Severity. Indicate whether event was:

- \_\_\_ Grade 1 = Mild
- \_\_\_ Grade 2 = Moderate
- \_\_\_ Grade 3 = Severe

12.6. Relationship to Study Medication. If “maybe” related, record “related.”

- \_\_\_ Related
- \_\_\_ Unrelated

12.7. Relationship to Study Device as Related or Unrelated. If “maybe” related, record “related.”

- \_\_\_ Related
- \_\_\_ Unrelated

12.8. Action Taken with Study Medication.

- \_\_\_ None
- \_\_\_ Dose Interrupted

12.9. Action Taken with Study Device

- \_\_\_ None
- \_\_\_ Removal of Controller/Delivery Circuit
- \_\_\_ Not Applicable

12.10. Indicate STOP date \_\_\_/\_\_\_/\_\_\_ or  
\_\_\_ Continuing at Discharge

12.11. Event Outcome

- \_\_\_ Recovered/Resolved
- \_\_\_ Recovering/Resolving
- \_\_\_ Recovered/Resolved with Sequelae
- \_\_\_ Not Recovered/Not Resolved
- \_\_\_ Fatal



# **FORM 14**

## **Transfusions**

14.1. Were any Transfusions Performed?

Yes

No

| 14.2. Transfusion Type* | 14.3. Volume in mL infused (numeric value only XX) | 14.4. Transfusion Start Date (Dd/mmm/yyyy) |
|-------------------------|----------------------------------------------------|--------------------------------------------|
|                         |                                                    |                                            |
|                         |                                                    |                                            |
|                         |                                                    |                                            |
|                         |                                                    |                                            |
|                         |                                                    |                                            |
|                         |                                                    |                                            |
|                         |                                                    |                                            |

**\*Transfusion Types:**

Packed Red Blood Cells (PRBC)

Fresh Frozen Plasma (FFP)

Platelets

Whole Blood

# FORM 15

## Concomitant Medications

15.1. Did Subject take any Concomitant Medications:

Yes  
 No

*Note: If more than one course, enter a new log line for each.*

| 15.2. Medication* | 15.2.1. Specify Other | 15.3. Indication** | 15.3.1. Specify Other | 15.4. Start Date***<br>(dd/mmm/yyyy) | 15.5. Stop Date***<br>(dd/mmm/yyyy) | 15.5.1. Ongoing<br>(checkbox) |
|-------------------|-----------------------|--------------------|-----------------------|--------------------------------------|-------------------------------------|-------------------------------|
|                   |                       |                    |                       | _ / _ / _                            | _ / _ / _                           |                               |
|                   |                       |                    |                       | _ / _ / _                            | _ / _ / _                           |                               |
|                   |                       |                    |                       | _ / _ / _                            | _ / _ / _                           |                               |
|                   |                       |                    |                       | _ / _ / _                            | _ / _ / _                           |                               |
|                   |                       |                    |                       | _ / _ / _                            | _ / _ / _                           |                               |
|                   |                       |                    |                       | _ / _ / _                            | _ / _ / _                           |                               |
|                   |                       |                    |                       | _ / _ / _                            | _ / _ / _                           |                               |
|                   |                       |                    |                       | _ / _ / _                            | _ / _ / _                           |                               |

**\*Medication Choices**

- Adrenaline
- Caffeine
- Dexamethasone
- Dobutamine
- Dopamine
- Furosemide
- Hydrochlorothiazide
- Hydrocortisone
- Ibuprofen
- Paracetamol
- Spironolactone
- Other, Specify \_\_\_\_\_

**\*\*Indication Choices**

- Prevention or Treatment of Apnea
- Prevention of BPD
- Treatment of BPD
- Treatment of PDA
- Treatment of Hypotension
- Other, Specify \_\_\_\_\_





# **FORM 16**

## **Discharge from NICU (*page 2*)**

16.7. Was Consent withdrawn?

- YES, by Parents\*
- YES, by PI\*\*
- NO

16.7.1. \*If Parent(s) withdrew consent,

Date \_\_\_/\_\_\_/\_\_\_ and Time \_\_\_: \_\_\_ withdrawn from study

16.7.2. \*\*If PI withdrew baby from study,

Date \_\_\_/\_\_\_/\_\_\_ and Time \_\_\_: \_\_\_ withdrawn from study

16.7.3. Reason PI withdrew Subject from study (Record reason-text field):

---

**Completed by (signature):** \_\_\_\_\_ **Date Completed:** \_\_\_\_\_

# FORM 17

## Protocol Deviations

17.1. Did Subject have any Protocol Deviations?

Yes

No

| 17.2.<br>Date of Deviation<br>(dd/mmm/yyyy) | 17.3.<br>Deviation* | 17.4.<br>Specify Other Details (Including I/E Criterion Numbers if applicable) |
|---------------------------------------------|---------------------|--------------------------------------------------------------------------------|
|                                             |                     |                                                                                |
|                                             |                     |                                                                                |

**\*Deviation Selections:**

- Inclusion/Exclusion criteria
- Randomization
- AeroFact dosing
- Bolus instilled surfactant dosing
- Assessments
- Other

Completed by (signature): \_\_\_\_\_

Date: \_\_\_\_\_
